# Supplementary material for: Longitudinal Associations of the Healthy Lifestyle Index Score With Quality of Life in People With Multiple Sclerosis: A Prospective Cohort Study
Source: PubMed Central journal article supplement (PMC6225868; doi:10.3389/fneur.2018.00874), 2018-11-02
Supplement: Image_1.pdf [file Image_1.pdf]

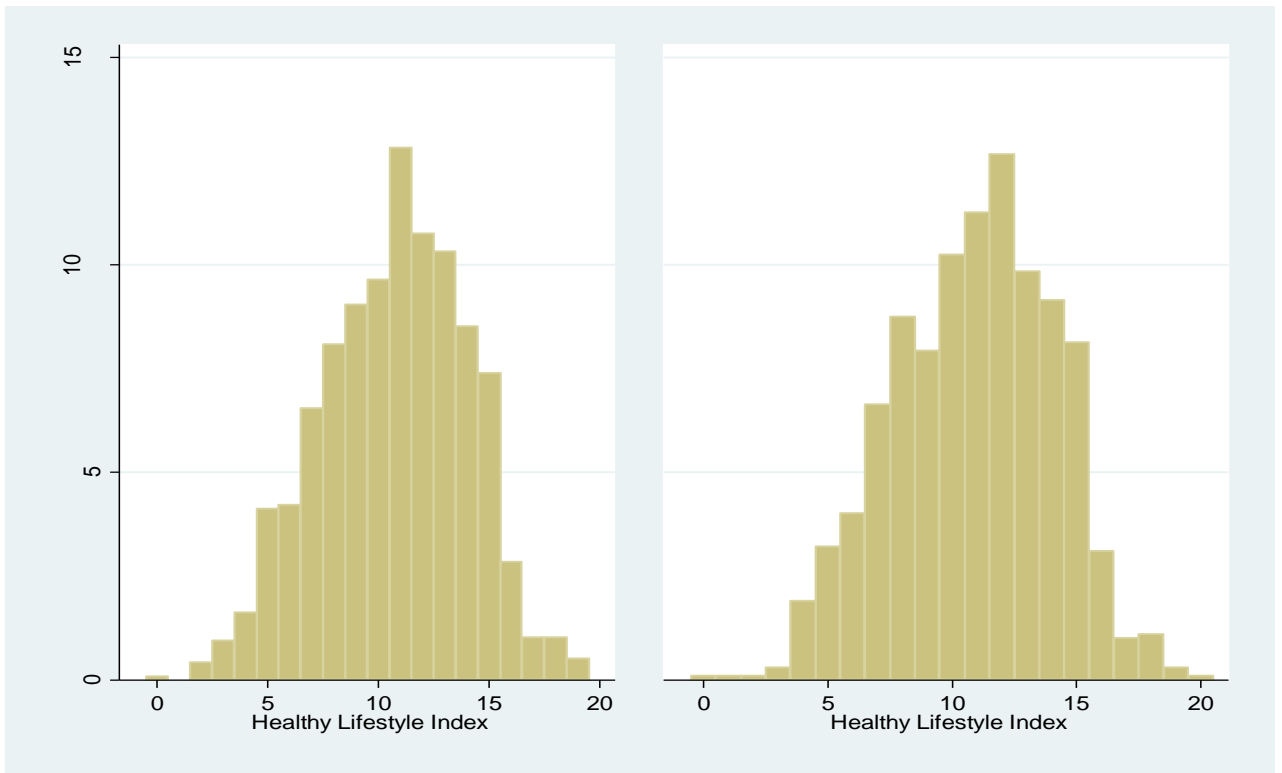

**Supplementary Figure 1.** Distribution of HLIS for longitudinal cohort (n=1401) at baseline (left) and follow-up (right).
